# Supplementary material for: Prevalence of Plasmid-Associated Tetracycline Resistance Genes in Multidrug-Resistant Escherichia coli Strains Isolated from Environmental, Animal and Human Samples in Panama
Source: MDPI journal article supplement (doi:10.3390/antibiotics12020280), 2023-01-31
Supplement: s1 [file s1]

Supplementary file

**Table S1.** Multi-drug resistant strains detected.

| Site            | Sampling source |     |       |     |       |
|-----------------|-----------------|-----|-------|-----|-------|
|                 | Chicken         | Cow | Human | Pig | Water |
| Ciudad del Niño | 10              | 4   | 1     | 8   | 2     |
| El Arado        | 8               | 3   | 0     | 7   | 5     |

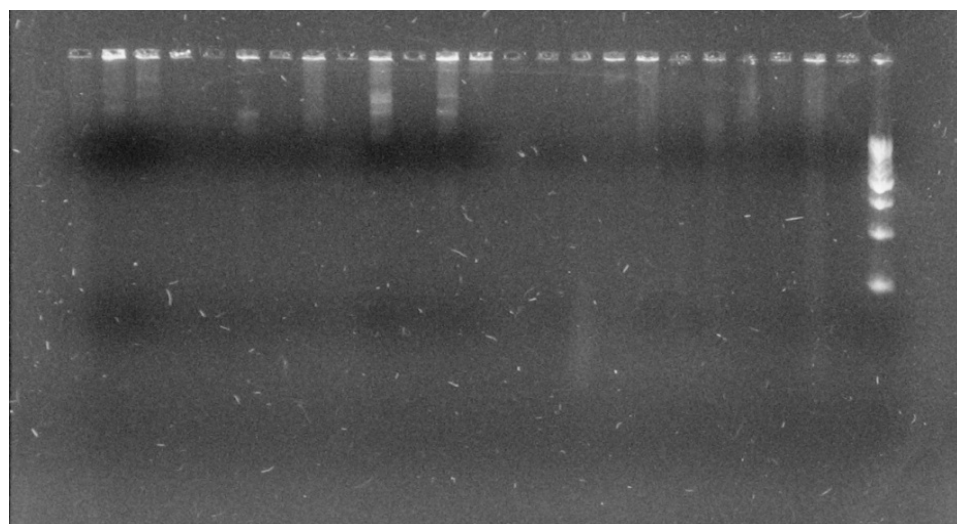

**Figure S1.** Detection of plasmid DNA by agarose gel electrophoresis. Chemical methods were used to extract and purify plasmid DNA from O/N cultures. Those samples presenting the characteristic bands of plasmid DNA were further analyzed.
